# Supplementary material for: Response to Flavored Cartridge/Pod-Based Product Ban among Adult JUUL Users: “You Get Nicotine However You Can Get It”
Source: PubMed Central journal article supplement (PMC7795757; doi:10.3390/ijerph18010207), 2020-12-30
Supplement: ijerph-18-00207-s001.pdf [file ijerph-18-00207-s001.pdf]

Supplemental Table 1: Participant Characteristics

|                                         | Quantitative Sample<br>(n=290)  | Qualitative Sample (n=16)      |
|-----------------------------------------|---------------------------------|--------------------------------|
| Age (SD) (median) (range)               | 31.7 (8.2) (30) (18-67)         | 33.8 (10.1) ( ) (23-59)        |
| % young adult (aged 18-25) (n)          | 21.7 (63)                       | 18.8 (3)                       |
| % male (n)                              | 63.7 (185)                      | 56.3 (9)                       |
| % current smoker (n) (timeframe)        | 18.3 (53) (in the past 30 days) | 56.3 (9) (in the past 90 days) |
| % current JUUL user in the past 30 days | 100.0 (290)                     | 93.8 (15)                      |
| Mean days used JUUL in the past 30 (SD) | 24.0 (8.3)                      | -                              |
| Mean JUUL times used per day (SD)       | 8.7 (9.2)                       | -                              |
